# Supplementary material for: Functional Mapping of Dynamic Traits with Robust t-Distribution
Source: PubMed Central journal article supplement (PMC3178556; doi:10.1371/journal.pone.0024902), 2011-09-22
Supplement: pone.0024902.s001.pdf [file pone.0024902.s001.pdf]

# Appendix S1

## Derivation of the EM algorithm

Define  $c_i = 0$  or  $1$  if the QTL genotype is  $Qq$  or  $QQ$ , respectively. The  $p$ -dimensional random observations  $\mathbf{y}_i$  ( $i = 1 \dots n$ ) are generated independently from a two-component mixture of multivariate  $t$  distribution with proportions  $\pi_{i|0}$  and  $\pi_{i|1}$

$$f(\mathbf{y}_i; \Omega) = \sum_{j=0}^1 \pi_{i|j} f_j(\mathbf{y}_i; \boldsymbol{\theta}_j) \quad (\text{A1})$$

where  $\pi_{i|j} = P(c_{i|j} = 1)$ ,  $\Omega = (\boldsymbol{\theta}_0, \boldsymbol{\theta}_1)$  and  $\boldsymbol{\theta}_j = (\boldsymbol{\mu}_j, \Sigma_j, \nu_j)$  ( $j = 0, 1$ ). Note that  $\pi_{i|0} + \pi_{i|1} = 1$ . The density  $f_j(\mathbf{y}_i; \boldsymbol{\theta}_j)$  is defined in Eq. (1). By the property of the multivariate  $t$  distribution [26],  $n$  independent draws from  $f_j(\mathbf{y}_i; \boldsymbol{\theta}_j)$  can be denoted as a weighted average of  $p$ -dimensional multivariate normal distributions with the weights  $\tau_i$  following a Gamma distribution, i.e.

$$\mathbf{y}_i | \tau_i, c_{i|j} = 1 \sim N_p(\boldsymbol{\mu}_j, \Sigma_j / \tau_i) \quad \text{for } i = 1, 2, \dots, n \quad j = 0, 1$$

and

$$\tau_i | c_{i|j} = 1 \sim \text{Gamma}\left(\frac{\nu_j}{2}, \frac{\nu_j}{2}\right) \quad \text{independently for } i = 1, 2, \dots, n \quad \text{and } j = 0, 1$$

where the  $\text{Gamma}(\alpha, \beta)$  density function is defined as

$$\beta^\alpha \tau^{\alpha-1} \exp(-\beta\tau) / \Gamma(\alpha) I_{(0, \infty)}(\tau), \quad (\alpha, \beta > 0)$$

The complete-data log-likelihood function can be expressed as

$$\ell^c(\boldsymbol{\Omega}) = \ell_1(\boldsymbol{\mu}, \boldsymbol{\Sigma} | \mathbf{y}, \boldsymbol{\tau}) + \ell_2(\boldsymbol{\nu} | \boldsymbol{\tau}) + \ell_3(\boldsymbol{\pi}) \quad (\text{A2})$$

where

$$\begin{aligned}\ell_1(\boldsymbol{\mu}, \boldsymbol{\Sigma} | \mathbf{y}, \boldsymbol{\tau}) &= \sum_{i=1}^n \sum_{j=0}^1 c_{i|j} \left\{ -\frac{1}{2} p \log(2\pi) - \frac{1}{2} \log |\boldsymbol{\Sigma}_j| \right. \\ &\quad \left. - \frac{1}{2} \boldsymbol{\tau}_i (\mathbf{y}_i - \boldsymbol{\mu}_j)' \boldsymbol{\Sigma}_j^{-1} (\mathbf{y}_i - \boldsymbol{\mu}_j) \right\} \\ \ell_2(\boldsymbol{\nu} | \boldsymbol{\tau}) &= \sum_{i=1}^n \sum_{j=0}^1 c_{i|j} \left\{ -\log \Gamma\left(\frac{\nu_j}{2}\right) + \frac{\nu_j}{2} \log \frac{\nu_j}{2} + \frac{\nu_j}{2} (\log \tau_i - \tau_i) - \log \tau_i \right\}\end{aligned}$$

and

$$\ell_3(\boldsymbol{\pi}) = \sum_{i=1}^n \sum_{j=0}^1 c_{i|j} \log(\pi_{i|j}), \quad \boldsymbol{\pi} = (\pi_{i|0}, \pi_{i|1})'$$

Then the MLEs of the parameters in  $\boldsymbol{\Omega} = (\Omega_m, \Omega_c, \Omega_\nu)$  are obtained by solving

$$\frac{\partial}{\partial \Omega_s} \ell^c(\boldsymbol{\Omega}) = 0 \quad (\text{A3})$$

In this study, the two multivariate  $t$  components were assumed to have the same covariance structure and the same degree of freedom, i.e.,  $\boldsymbol{\Sigma}_1 = \boldsymbol{\Sigma}_2 = \boldsymbol{\Sigma}$  and  $\nu_1 = \nu_2 = \nu$ . By choosing the uniform quadratic B-spline with degree 5, we obtained the normalized basis matrix  $\mathbf{B}$  as

$$\mathbf{B} = \begin{bmatrix} 1 & 0 & 0 & 0 & 0 \\ 0.390625 & 0.5390625 & 0.0703125 & 0 & 0 \\ 0.0625 & 0.65625 & 0.28125 & 0 & 0 \\ 0 & 0.3828125 & 0.609375 & 0.0078125 & 0 \\ 0 & 0.125 & 0.75 & 0.125 & 0 \\ 0 & 0.0078125 & 0.609375 & 0.3828125 & 0 \\ 0 & 0 & 0.28125 & 0.65625 & 0.0625 \\ 0 & 0 & 0.0703125 & 0.5390625 & 0.390625 \\ 0 & 0 & 0 & 0 & 1 \end{bmatrix} \quad (\text{A4})$$

and  $\boldsymbol{\xi}_j$  as the base genotypic vector for genotype  $j$

$$\boldsymbol{\xi}_j = \left[ \xi_{0j} \quad \xi_{1j} \quad \xi_{2j} \quad \xi_{3j} \quad \xi_{4j} \right]' \quad (\text{A5})$$

whose entries are the mean parameters to be estimated with the mean vector given by  $\boldsymbol{\mu}_j = \mathbf{B}\boldsymbol{\xi}_j$ .

For the SAD(1) covariance structure, it has very nice properties. For example, the inverse of the covariance matrix can be explicitly expressed (see [15] for more details).

Define

$$\mathbf{L} = \begin{bmatrix} 1 & 0 & 0 & \dots & \dots & 0 \\ -\phi & 1 & 0 & 0 & \dots & 0 \\ 0 & -\phi & 1 & 0 & \dots & 0 \\ \vdots & \dots & \dots & \dots & \dots & \vdots \\ 0 & \dots & 0 & -\phi & 1 & 0 \\ 0 & \dots & \dots & 0 & -\phi & 1 \end{bmatrix}$$

and

$$\boldsymbol{\Gamma}(\phi) = \begin{bmatrix} 1 + \phi^2 & -\phi & 0 & \dots & 0 \\ -\phi & 1 + \phi^2 & -\phi & \dots & 0 \\ 0 & -\phi & 1 + \phi^2 & -\phi & \vdots \\ \vdots & \dots & \dots & \dots & 0 \\ 0 & \dots & -\phi & 1 + \phi^2 & -\phi \\ 0 & \dots & 0 & -\phi & 1 \end{bmatrix}$$

The ML estimator of the unknown parameters can be obtained using the following EM algorithm. At the  $k$ th iteration in the **E-step**, the posterior probability of the observed trait vector  $\mathbf{y}_i$  belonging to the genotype  $j$  can be expressed as

$$\hat{c}_{i|j}^{(k)} = \mathbb{E}(c_{i|j} = 1 | \mathbf{y}_i; \hat{\Omega}^{(k)}) = \frac{\pi_{i|j} f_j(\mathbf{y}_i; \hat{\boldsymbol{\theta}}_j^{(k)})}{\pi_{i|0} f_0(\mathbf{y}_i; \hat{\boldsymbol{\theta}}_0^{(k)}) + \pi_{i|1} f_1(\mathbf{y}_i; \hat{\boldsymbol{\theta}}_1^{(k)})} \quad (j = 0, 1) \quad (\text{A6})$$

where  $\hat{\boldsymbol{\theta}}_j = (\hat{\boldsymbol{\mu}}_j, \hat{\sigma}^2, \hat{\phi}, \hat{\nu})$  ( $j = 0, 1$ ). And the conditional expectation of  $\tau_i$  given  $c_{i|j} = 1$  is calculated as

$$\hat{\tau}_{ij}^{(k)} = \mathbb{E}(\tau_i | \mathbf{y}_i, c_{i|j} = 1; \hat{\Omega}^{(k)}) = \frac{\hat{\nu}^{(k)} + p}{\hat{\nu}^{(k)} + (\mathbf{y}_i - \mathbf{B}\hat{\boldsymbol{\xi}}_j^{(k)})' \frac{1}{\hat{\sigma}^2^{(k-1)}} \mathbf{L}' \mathbf{L} (\mathbf{y}_i - \mathbf{B}\hat{\boldsymbol{\xi}}_j^{(k)})} \quad (j = 0, 1) \quad (\text{A7})$$

In the **M-step**, the updates for  $\xi_j$ ,  $\sigma^2$  and  $\phi$  are obtained as :

$$\hat{\xi}_j^{(k+1)} = \frac{\sum_{i=1}^n \hat{c}_{i|j}^{(k)} \hat{\tau}_{ij}^{(k)} \mathbf{B}'\mathbf{L}'\mathbf{L}\mathbf{y}_i}{\sum_{i=1}^n \hat{c}_{i|j}^{(k)} \hat{\tau}_{ij}^{(k)} \mathbf{B}'\mathbf{L}'\mathbf{L}} \quad (\text{A8})$$

$$\hat{\sigma}^2^{(k+1)} = \frac{\sum_{i=1}^n \sum_{j=0}^1 \hat{c}_{i|j}^{(k)} \hat{\tau}_{ij}^{(k)} (\mathbf{y}_i - \mathbf{B}\hat{\xi}_j^{(k+1)})'\mathbf{L}'\mathbf{L}(\mathbf{y}_i - \mathbf{B}\hat{\xi}_j^{(k+1)})}{np} \quad (\text{A9})$$

and

$$\hat{\phi}^{(k+1)} = \frac{\sum_{i=1}^n \sum_{j=0}^1 \hat{c}_{i|j}^{(k)} \hat{\tau}_{ij}^{(k)} \sum_{k=1}^{p-1} [y_i(t_k) - \mathbf{B}'_k \hat{\xi}_j^{(k+1)}]' [y_i(t_{k+1}) - \mathbf{B}'_{k+1} \hat{\xi}_j^{(k+1)}]}{\sum_{i=1}^n \sum_{j=0}^1 \hat{c}_{i|j}^{(k)} \hat{\tau}_{ij}^{(k)} \sum_{k=1}^{p-1} [y_i(t_k) - \mathbf{B}'_k \hat{\xi}_j^{(k+1)}]^2} \quad (\text{A10})$$

Given the degree of freedom of the multivariate  $t$  distribution, the above MLEs will be updated in closed form. To update  $\nu$ , we obtain  $\hat{\nu}^{(k+1)}$  by finding the solution to the equation:

$$\begin{aligned} \sum_{i=1}^n \sum_{j=0}^1 \hat{c}_{i|j}^{(k)} \{ & -\psi\left(\frac{\nu}{2}\right) + \log\left(\frac{\nu}{2}\right) + 1 + \log(\hat{\tau}_{ij}^{(k)}) - \hat{\tau}_{ij}^{(k)} \\ & + \psi\left(\frac{\hat{\nu}^{(k)} + p}{2}\right) - \log\left(\frac{\hat{\nu}^{(k)} + p}{2}\right) \} = 0 \quad (j = 0, 1) \end{aligned} \quad (\text{A11})$$

where the digamma function  $\psi(x)$  is defined as  $\psi(x) \equiv \frac{d(\log\Gamma(a))}{da} = \frac{\Gamma'(a)}{\Gamma(a)}$ . The one-dimensional search for  $\hat{\nu}^{(k+1)}$  is time consuming. Shoham [27] provided a direct approximation solution of accurateness  $|\nu - \nu^*| < 10^{-3}$  to this nonlinear equation, i.e.

$$\nu^* = \frac{2}{h + \log h - 1} + 0.0416(1 + \text{erf}(0.6594 \times \log(\frac{2.1971}{h + \log h - 1}))) \quad (\text{A12})$$

where

$$h = -\frac{1}{n} \sum_{i=1}^n \sum_{j=0}^1 \hat{c}_{i|j}^{(k)} \{ \log(\hat{\tau}_{ij}^{(k)}) - \hat{\tau}_{ij}^{(k)} + \psi\left(\frac{\hat{\nu}^{(k)} + p}{2}\right) - \log\left(\frac{\hat{\nu}^{(k)} + p}{2}\right) \}$$

The above procedures are iterated until certain convergence criterion is achieved. The converged values are the MLEs of the parameters. Note that in the above EM algorithm, we used a grid search method to estimate the QTL location instead of estimating the QTL segregation parameters in  $\Omega_l$  directly.
